# Supplementary material for: A transcription factor PU.1 is critical for Ccl22 gene expression in dendritic cells and macrophages
Source: Sci Rep. 2019 Feb 4;9:1161. doi: 10.1038/s41598-018-37894-9 (PMC6361964; doi:10.1038/s41598-018-37894-9)
Supplement: Supplementary file 1 — Supplemental information [file 41598_2018_37894_MOESM1_ESM.pdf]

**A transcription factor PU.1 is critical for *Ccl22* gene expression in  
dendritic cells and macrophages**

**Takuya Yashiro, Shiori Nakano, Kurumi Nomura, Yuna Uchida,  
Kazumi Kasakura, and Chiharu Nishiyama**

Department of Biological Science and Technology,  
Faculty of Industrial Science and Technology, Tokyo University of Science,  
6-3-1 Nijjuku, Katsushika-ku, Tokyo, 125-8585, Japan

**Supplementary Table 1. Sequence of primers used in construction of reporter vectors.**

| 5' position | Direction | Sequence                       |
|-------------|-----------|--------------------------------|
| -597        | Forward   | CATAggtaccGCACACTCACTCTGGCTCGC |
| -245        | Forward   | CGTGggtaccATCCATGTGCCAGTGGCCAC |
| -101        | Forward   | CCACggtaccACAATCCTCCGGAGACCCAC |
| -65         | Forward   | CGTAgttaccAGTCCCCTCTGAGTAGTTC  |
| -27         | Forward   | CGTAgttaccGCTGGGGGAAGTGGGACT   |
| +108        | Reverse   | GTGCagatctGTCAGGTGTCTAATGACCAG |

| Mutation site | Direction | Sequence                                        |
|---------------|-----------|-------------------------------------------------|
| Site1         | Forward   | CTGGCCGGTACCGCTGGGACTAGTGGGACTTCTTCTTTCAG       |
|               | Reverse   | CTGAAAGAAGAAGTCCCAGTCCCAGCGGTA<br>CCGGCCAG      |
| Site2         | Forward   | CCGCTGGGGGAAGTGGGACTAGATCTTTCAGGACATGAATGTC     |
|               | Reverse   | GACATTCATGTCCTGAAAGATCTAGTCCCAGTTC<br>CCCCAGCGG |
| Site1&2       | Forward   | CCGCTGGGACTAGTGGGACTAGATCTTTCAGGACATGAATGTC     |
|               | Reverse   | GACATTCATGTCCTGAAAGATCTAGTCCCAGTTC<br>TCCCAGCGG |

**Supplementary Table 2. Sequence of primers used in ChIP assay.**

<Mouse>

| Amplified region | Direction | Sequence                    |
|------------------|-----------|-----------------------------|
| -1780/-1714      | Forward   | CCAAAGGGTTTTGAGCTCTCA       |
|                  | Reverse   | GCTACTTCAGAGGGTAAAAAAAAAAGG |
| -1080/-1008      | Forward   | AAAGCCCACCGCATCATG          |
|                  | Reverse   | GCTGACTGTGTGCTCCAGGTT       |
| -17/+52          | Forward   | GTGGGACTTCTTCTTTCAGGACAT    |
|                  | Reverse   | CCCACTAGTTCAGGCACCTCTT      |

<Human>

| Amplified region | Direction | Sequence                   |
|------------------|-----------|----------------------------|
| -2106/-2046      | Forward   | ACCAGCCCTGGCAACATAGT       |
|                  | Reverse   | CGCCCTGCTCATTTTTATTCT      |
| -153/-76         | Forward   | CCCCGCCAAAGAGAATTTC        |
|                  | Reverse   | GAGTCACTTGACATTCACATCTCAAA |

\*+1; Transcription start site

## Supplemental figure

### Materials and Methods

#### Materials

For detection of the mouse *Fizz-1/Retnla* and *Ym-1/Chil3* mRNAs, the following primers were used: mFizz1-F, 5'-ATCCCATGGCGTATAAAAGCAT-3', mFizz1-R, 5'-GGGCAGAATCTCAGGAAAGGTT-3', mYm1-F, 5'-TCTGGTGAAGGAAATGCGTAAA-3', mYm1-R, 5'-GCAGCCTTGGAATGTCTTTCTC-3'.

*Spi1/Pu.1* siRNA #1, 2 (Stealth Select RNAi, MSS247678 and MSS277025, respectively), and negative control siRNA (Stealth Negative Control Hi GC, 12935-400) were obtained from Invitrogen (Carlsbad, CA).

#### Methods

##### Preparation of Th2 cells and Migration assay

Naïve CD4<sup>+</sup> T cells prepared from spleen using a MojoSort Ms CD4 Naïve T cell isolation kit (#480040, BioLegend) were polarized to Th2 cells by cultivation in the medium supplemented with 20 ng/ml recombinant mouse IL-4 (#094-03944, Wako) and 10 µg/ml anti-IL-12p40 antibody (C17.8, BioLegend) in dishes coated with 1 µg/ml anti-CD3 antibody (145-2C11, TONBO) and 10 µg/ml anti-CD28 antibody (37.51, TONBO) for 5 days. The generated Th2 cells (5 x 10<sup>5</sup>/100 µl) were subjected on upper site of a transwell (5 µm pore size #3421, Corning), which were placed on a well filled

with 500  $\mu$ l culture supernatant of siRNA-introduced BMDCs. After 3 h incubation, the cell number on lower site of a transwell was counted.

### **Figure legends**

#### **Sup. Fig. 1. Western blotting profile of *in vitro* translated protein**

Five  $\mu$ l of 20-fold diluted *in vitro* translated reaction mixture was loaded and detected by anti-PU.1 antibody.

#### **Sup. Fig. 2. Expression of Fizz-1 (*Retnla*) and Ym-1 (*Chil3*) in *Spi1* siRNA introduced BMDMs**

BMDMs were transfected with either negative control siRNA (siNega) or *Spi1* siRNA (siSpi1). At 48 h after transfection, relative mRNA levels were determined by quantitative RT-PCR after normalizing to mouse *Gapdh* mRNA levels. Data are expressed as the ratio of the expression level of the respective control siRNA-transfected cells. Results are means + S.D.s ( $n=3$ ). Similar results were obtained in three independent experiments. \*,  $p < 0.05$ .

#### **Sup. Fig. 3. Effect of *Spi1* siRNA on the migration activity**

*In vitro* differentiated Th2 cells were seeded in the upper chambers of the transwell. The lower chambers were filled with culture supernatants from BMDCs transfected with either negative control siRNA (siNega) or *Spi1* siRNA (siSpi1) or culture medium as negative control (N.C.). After 3 h incubation, the cell number on lower site was

counted.

The numbers of migrated T cells are shown.

**Sup. Fig. 4. Effect of *Spi1* siRNA on the expression of *Ccl22***

BMDCs were transfected with either negative control siRNA (siNega) or *Spi1* siRNA (siSpi1). At 48 h after transfection, relative mRNA levels were determined by quantitative RT-PCR after normalizing to mouse *Gapdh* mRNA levels. Data are expressed as the ratio of the expression level of the respective control siRNA-transfected cells. Results are means + S.D.s ( $n=3$ ). Similar results were obtained in three independent experiments. \*,  $p < 0.05$ .

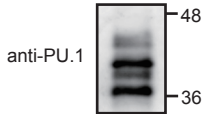

Sup. Fig. 1

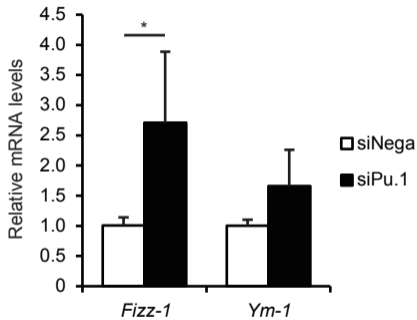

Sup. Fig. 2

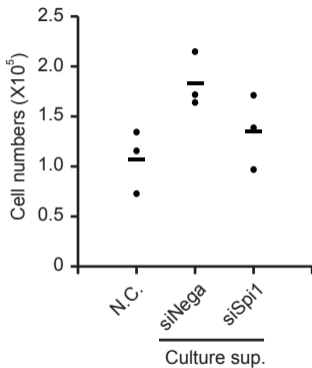

Sup. Fig. 3

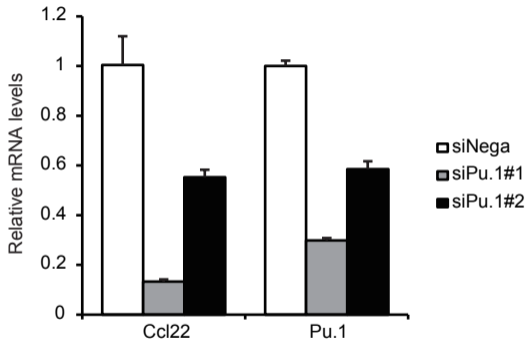

Sup. Fig. 4

Related to Fig. 2B

Related to Fig. 2C

Related to Fig. 2D

Raw data

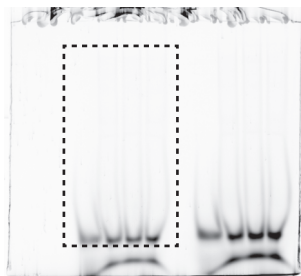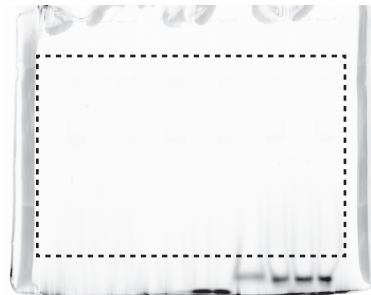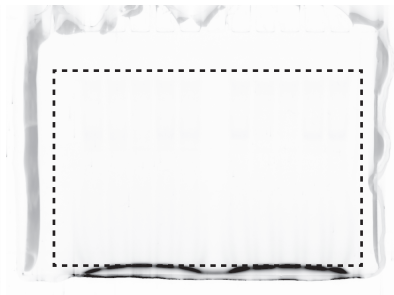

Medium  
contrast

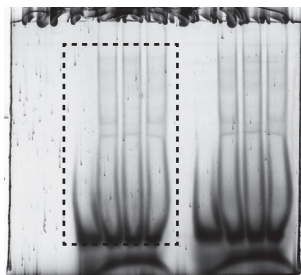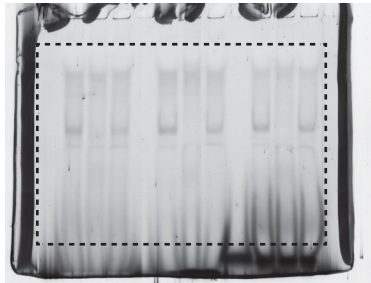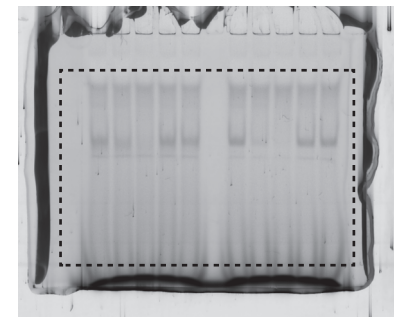

High  
contrast

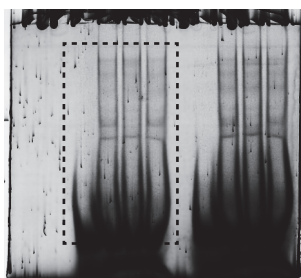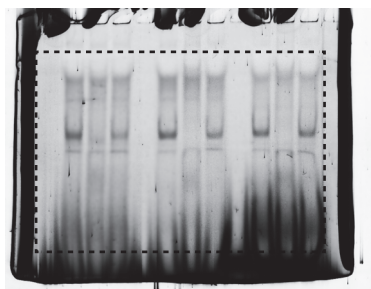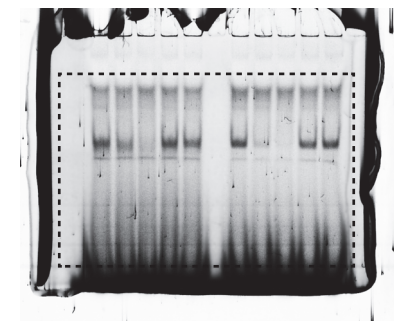

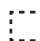 Cropped area

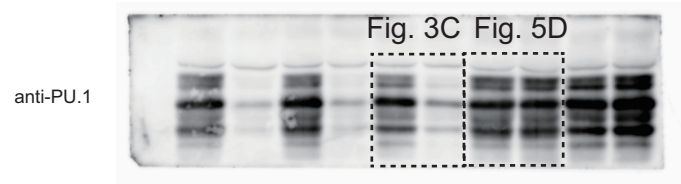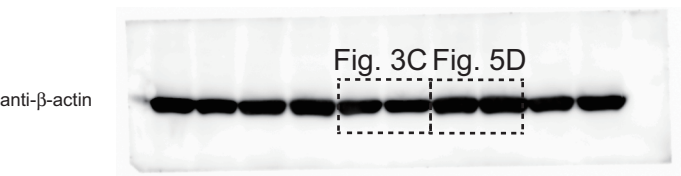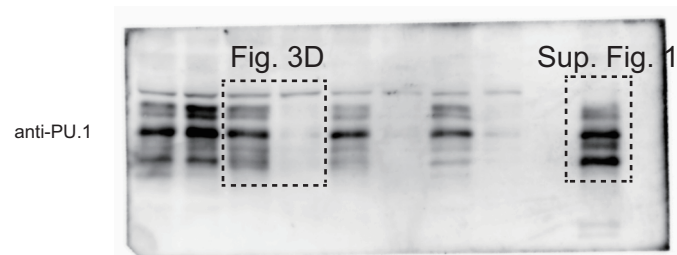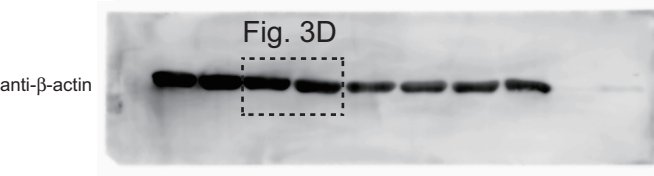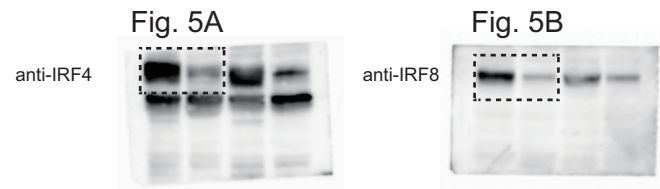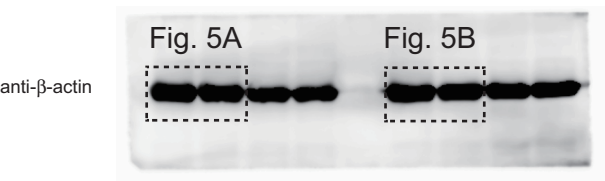

□ Cropped area
